# Supplementary material for: Beneficial Metabolic Effects of Chitosan and Chitosan Oligosaccharide on Epididymal WAT Browning and Thermogenesis in Obese Rats
Source: PubMed Central journal article supplement (PMC6943480; doi:10.3390/molecules24244455), 2019-12-05
Supplement: molecules-24-04455-s001.pdf [file molecules-24-04455-s001.pdf]

**Supplementary Table 1.** Experimental Materials

| <b>Materials</b>    | <b>Catalog No.</b>                            | <b>Company</b>                                                          |
|---------------------|-----------------------------------------------|-------------------------------------------------------------------------|
| COST (MW≤1,000 Da), | (degree of deacetylation, ≥90%; lot: 160326C) | Shangdong AK Biotech Co., Ltd. (Qingdao, Shandong, China)               |
| COSM (MW≤3,000 Da)  | (degree of deacetylation, ≥90%; lot: 160408C) | Shangdong AK Biotech Co., Ltd. (Qingdao, Shandong, China)               |
| CTS                 | degree of deacetylation, ≥85%; lot: 171112A   | Shangdong AK Biotech Co., Ltd. (Qingdao, Shandong, China)               |
| Orlistat            | 2016120860088                                 | Zhongshan Wanhan Pharmaceutical Co., Ltd. (Guangzhou, GuangDong, China) |

**Supplementary Table 1.** The formula of the high-fat diet (HFD)

| <b>Composition</b> | <b>Content (%)</b> |
|--------------------|--------------------|
| Basic feed         | 54                 |
| Lard               | 15                 |
| Sucrose            | 15                 |
| Milk powder        | 4                  |
| Peanut             | 3                  |
| Egg yolk powder    | 5                  |
| Salt               | 2                  |
| Sesame oil         | 1                  |
| CaHPO <sub>4</sub> | 0.6                |
| Mountain flour     | 0.4                |

**Supplementary Table 2.** Primer sequences for qRT-PCR

| Gene           | Primer Sequences                                                                  |
|----------------|-----------------------------------------------------------------------------------|
| UCP1           | Forward: 5'-CCAGGCTTCCAGTACTATTAGG-3'<br>Reverse: 5'-GTA CTCTTGGACCGTATCGTAG-3'   |
| PGC1 $\alpha$  | Forward: 5'-TATTCATTGTTTCGATGTGTTCGC-3'<br>Reverse: 5'-TGTCTGTAGTGGCTTGATTCAT-3'  |
| PRDM16         | Forward: 5'-GACGCCATAAGAAGTATGCATG-3'<br>Reverse: 5'-GATCACATTTGTA CTACACGCTC-3'  |
| p38-MAPK       | Forward: 5'-AAGACTTCCCAGCAGTCCTATC-3'<br>Reverse: 5'-CTGGAGGATCAGTTGTGTTCAA-3'    |
| TMEM26         | Forward: 5'-CCATTACCCAGGGAGGAGCA-3'<br>Reverse: 5'-AACAACTTGGTTGCTGGGCA-3'        |
| ATF2           | Forward: 5'-GAAGCACCGGAACCAAGAGG-3'<br>Reverse: 5'-TCTCTGCACGATGCACACAC-3'        |
| Slc27a1        | Forward: 5'-GGCTGTGTATGGAGTGGCTGTG-3'<br>Reverse: 5'-GGCAGAAGACGCAGGAAGATGG-3'    |
| $\beta$ -actin | Forward: 5'-GGCTGTATTCCCCTCCATCG-3'<br>Reverse: 5'-CCAGTTGGTAACAATGCCATGT-3'      |
| PKA            | Forward: 5'-GGACAAGCAGAAGGTGGTGAAGC-3'<br>Reverse: 5'-ACCAGGCACGTA CTCCATGACC-3'  |
| Dio2           | Forward: 5'-GAAGCACCGGAACCAAGAGG-3'<br>Reverse: 5'-TCTCTGCACGATGCACACAC-3'        |
| FTO            | Forward: 5'-GACCGTCCTGCGATGATGAAGTG-3'<br>Reverse: 5'-CCTGTCCACCAAGTTCTCGTCATG-3' |
| PPAR $\gamma$  | Forward: 5'-CCATCGAGGACATCCAAGACAACC-3'<br>Reverse: 5'-GCTCTGTGACAATCTGCCTGAGG-3' |
| PPAR $\alpha$  | Forward: 5'-GCGTACGGCAATGGCTTTAT-3'<br>Reverse: 5'-GAACGGCTTCCTCAGGTTCTT-3'       |

**Supplementary Table 3.** Primary antibodies for western blotting

| Antibodies     | Company | Catalog No. | Dilution           |
|----------------|---------|-------------|--------------------|
| UCP1           | abcam   | ab10983     | 1/1000             |
| PRDM16         | abcam   | ab106410    | 1 - 2 $\mu$ g/ml   |
| PGC-1 $\alpha$ | abcam   | ab54481     | 1/1000             |
| P38-MAPK       | abcam   | ab170099    | 1/1000 - 1/5000    |
| ATF2           | abcam   | ab47476     | 1/500 - 1/1000     |
| $\beta$ -actin | abcam   | ab5694      | 0.5 - 2 $\mu$ g/ml |

**Supplementary Table 4.** Changes of food intake in SD obese rats during administration (n=10, mean $\pm$ SD)

| Group    | food intake (g/week) |
|----------|----------------------|
| NF       | 167.94 $\pm$ 5.97    |
| HF       | 152.02 $\pm$ 6.08    |
| Orlistat | 175.88 $\pm$ 8.34    |
| COST     | 140.16 $\pm$ 10.54   |
| COSM     | 160.62 $\pm$ 10.61   |
| CTS      | 147.95 $\pm$ 4.93    |

\*p&lt;0.05, \*\*p&lt;0.01 vs HF.

**Supplementary Table 5.** Changes of body weight in obese SD rats before and after administration and weight gain in obese SD rats (n=10, means±SD)

| Group    | Body weight before administration (g) | Body weight after administration (g) | Weight gain (g) |
|----------|---------------------------------------|--------------------------------------|-----------------|
| NF       | 446.83±68.28                          | 530.03±89.79                         | 76.44±23.39*    |
| HF       | 610.19±48.93                          | 700.84±52.78                         | 102.03±26.45    |
| COST     | 562.73±41.21                          | 610.06±48.97                         | 52.78±20.21**   |
| COSM     | 573.56±48.2                           | 636.02±65.55                         | 55.78±22.19**   |
| CTS      | 555.67±31.73                          | 601.9±56.37                          | 60.04±24.75**   |
| Orlistat | 546.82±28.17                          | 618.98±36                            | 69.07±20.88*    |

\*p<0.05, \*\*p<0.01 vs HF.

**Supplementary Table 6.** Fat pad and fat/body ratio (fat content) of obese SD rats in each group (n=10, means±SD)

| Group    | Epididymal fat (g) | Perirenal fat (g) | Subcutaneous fat (g) | Brown fat (g) | Fat pad (g)   | Fat Content (%) |
|----------|--------------------|-------------------|----------------------|---------------|---------------|-----------------|
| NF       | 6.47±0.68**        | 7.52±1.03**       | 7.21±1.39**          | 0.52±0.05     | 20.66±5.93**  | 4.07±1.07**     |
| HF       | 15.11±2.65         | 23.65±3.12        | 13.99±1.54           | 0.52±0.08     | 50.31±3.39    | 6.47±2.14       |
| COST     | 9.25±2.7**         | 14.19±4.4**       | 12.54±6.08**         | 0.88±0.11**   | 31.53±10.81** | 5.22±1.42**     |
| COSM     | 10.48±2.99*        | 14.32±4.58*       | 9.79±3.16*           | 0.84±0.62*    | 31.59±8.87*   | 5.04±1.3*       |
| CTS      | 9.9±2.84**         | 16.19±6.09**      | 11.56±5.7**          | 0.90±0.22**   | 31.87±10.98** | 5.49±1.10**     |
| Orlistat | 10.41±1.55**       | 16.06±0.85**      | 10.66±1.60**         | 0.59±0.05     | 32.08±13.67*  | 5.11±2*         |

\*p<0.05, \*\*p<0.01 vs HF.

**Supplementary Table 7.** Serum T-CHO, TG, HDL-C, LDL-C, FFA and Glucose levels in SD rats (n=10, means±SD)

| Group    | TC (mmol/L) | TG (mmol/L) | HDL-C (mmol/L) | LDL-C (mmol/L) | FFA (umol/L)    | Glucose (umol/L) |
|----------|-------------|-------------|----------------|----------------|-----------------|------------------|
| NF       | 1.55±0.21** | 0.53±0.15** | 0.32±0.09**    | 0.42±0.08**    | 363.24±113.03** | 10.83±0.42**     |
| HF       | 3.25±1.00   | 1.60±0.65   | 0.03±0.02      | 1.46±0.34      | 611.79±151.83   | 13.55±0.74       |
| Orlistat | 2.25±0.25** | 0.75±0.05** | 0.16±0.03**    | 0.60±0.24**    | 302.85±89.62**  | 8.12±0.63**      |
| COSM     | 1.74±0.45** | 0.65±0.22** | 0.12±0.04**    | 0.90±0.26**    | 386.39±145.91*  | 10.49±0.49**     |
| COST     | 1.95±0.53** | 0.65±0.18** | 0.14±0.02**    | 0.93±0.29**    | 371.95±180.39** | 10.51±0.53**     |
| CTS      | 2.27±0.17** | 0.72±0.19** | 0.09±0.05*     | 1.09±0.24*     | 373.43±107.15** | 9.38±0.57**      |

\*p<0.05, \*\*p<0.01 vs HF.

**Supplementary Table 8.** Comparison of valid data and reference genome for each group

| Sample | Total Mapping (%) | Uniquely Mapping (%) |
|--------|-------------------|----------------------|
| HF1    | 93.55             | 75.83                |
| HF2    | 92.67             | 75.1                 |
| HF3    | 93.4              | 74.32                |
| NF1    | 93.94             | 76.11                |
| NF2    | 93.57             | 75.75                |
| NF3    | 93.53             | 75.18                |
| COSM1  | 93.58             | 75.88                |
| COSM2  | 93.16             | 73.53                |
| COSM3  | 93.79             | 76.96                |
| COST1  | 93.77             | 75.77                |
| COST2  | 93.89             | 76.73                |
| COST3  | 93.47             | 74.86                |
| CTS1   | 93.53             | 74.61                |
| CTS2   | 93.74             | 76.31                |
| CTS3   | 94.1              | 77.61                |

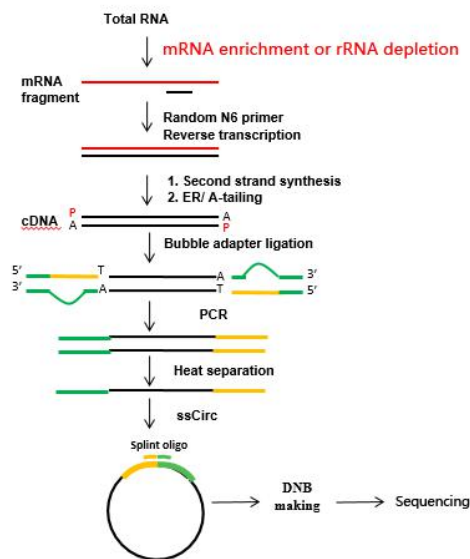

**Supplementary Figure 1.** mRNA library construction flow chart. Total RNA was extracted from WAT using a commercial kit, and the concentration and quality were detected. The BGI group (Shenzhen, GuangDong) conducted digital gene expression tag profiling. RNA was reverse transcribed to obtain double-stranded cDNA. The PCR product was denatured using heat, and the single-stranded DNA was cyclized using a splint oligo and DNA ligase. The prepared library was sequenced, and subsequently, the differentially expressed genes (DEGs) were identified using the NOISeq method. Then, the DEGs were clustered with Gene Ontology (GO) analysis.

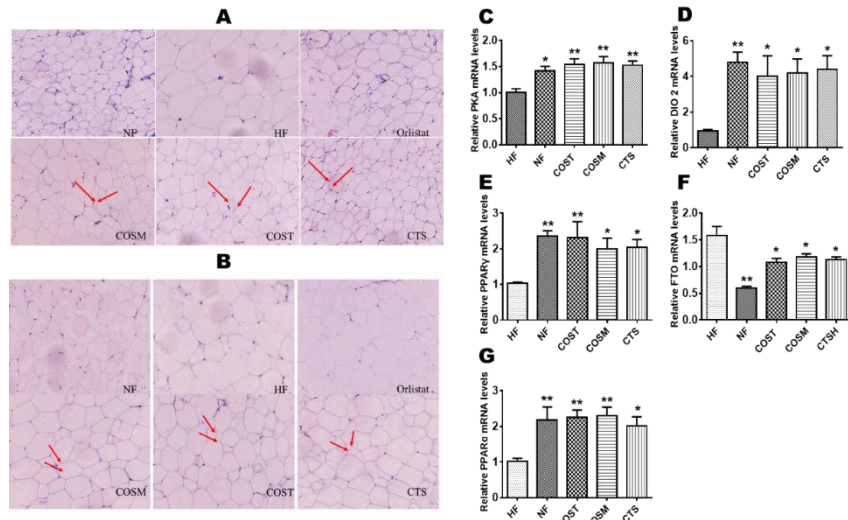

**Supplementary Figure 2.** CTS, COST and COSM inhibit WAT proliferation, increase liver fatty acid metabolism and promote browning of WAT. A: Histopathology of subcutaneous fat (200×). B: Histopathology of perirenal fat (200 ×). Relative epididymal WAT mRNA expression levels of PKA (C), Dio2 (D), PPAR $\gamma$  (E), and FTO (F) were quantified by qRT-PCR. Relative liver mRNA expression levels of PPAR $\alpha$  (G) was quantified by qRT-PCR. Data are expressed as mean  $\pm$  SD. \*P < 0.05 and \*\*P < 0.01 vs. HF group.

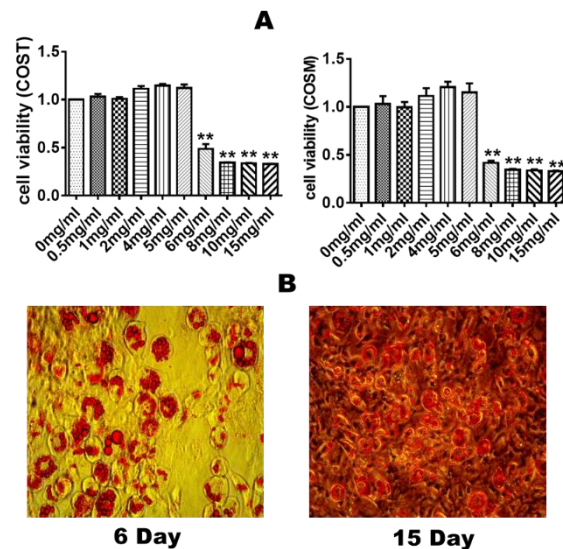

**Supplementary Figure 3.** Screening of COST and COSM dosing doses and exploration of the time of 3T3-L1 modeling. The CCK8 cytotoxicity test results showed that COST and COSM were added to the 3T3-L1 cell culture medium for 24 h, and the cell viability of the concentration below 5 mg/ml was higher than 90%. Therefore, this experiment selected COST, COSM high, medium and low doses for subsequent experiments, the concentrations were: 0.5 mg / ml, 2.5mg / ml, 5mg / ml, recorded as COSMH, COSMM, COSML and COSTH, COSTM, COSTL (A). The results of the oil red O staining experiment showed that after 6 days of induction, the cells became large and saturated, and the cells began to produce ring-shaped lipid droplets. After 15 days of induction, more than 90% of the cells differentiated into mature adipocytes, suggesting that the induction of 3T3-L1 precursor adipocytes to adipocytes was successful (B). Data are expressed as mean  $\pm$  SD. \*P < 0.05 and \*\*P < 0.01 vs. 0mg/ml group.
